# Supplementary material for: Mixed-valence compounds based on heterometallic-oxo-clusters containing Sb(iii,v): crystal structures and proton conduction
Source: Royal Society of Chemistry journal article supplement (doi:10.1039/d3dt03904h), 2023-12-07
Supplement: d3dt03904h1.pdf [file d3dt03904h1.pdf]

## Mixed-valence compounds based on heterometal-oxo-clusters

### containing Sb(III, V): Crystal structures and proton conduction

Wei-Yang Wen,<sup>b,c</sup> Wen Ma,<sup>\*a,b</sup> Bing Hu,<sup>\*b,d</sup> Hui-Ping Xiao,<sup>c</sup> Tian-Yu Pan,<sup>b,c</sup> Jia-Ting Liu,<sup>b,c</sup> Hao-Wei Lin,<sup>b,c</sup> Xin-Xiong Li<sup>c</sup> and Xiao-Ying Huang<sup>\*b,d</sup>

<sup>a</sup> School of Materials and Chemical Engineering, Xuzhou University of Technology, Xuzhou, Jiangsu, China. [mawen@xzit.edu.cn](mailto:mawen@xzit.edu.cn)

<sup>b</sup> State Key Laboratory of Structure Chemistry, Fujian Institute of Research on the Structure of Matter, Chinese Academy of Sciences, Fuzhou 350002, China. E-mail: [xyhuang@fjirsm.ac.cn](mailto:xyhuang@fjirsm.ac.cn), [hubing@fjirsm.ac.cn](mailto:hubing@fjirsm.ac.cn)

<sup>c</sup> College of Chemistry, Fuzhou University, Fuzhou 350116, Fujian, China.

<sup>d</sup> University of Chinese Academy of Sciences, Beijing 100049, China.

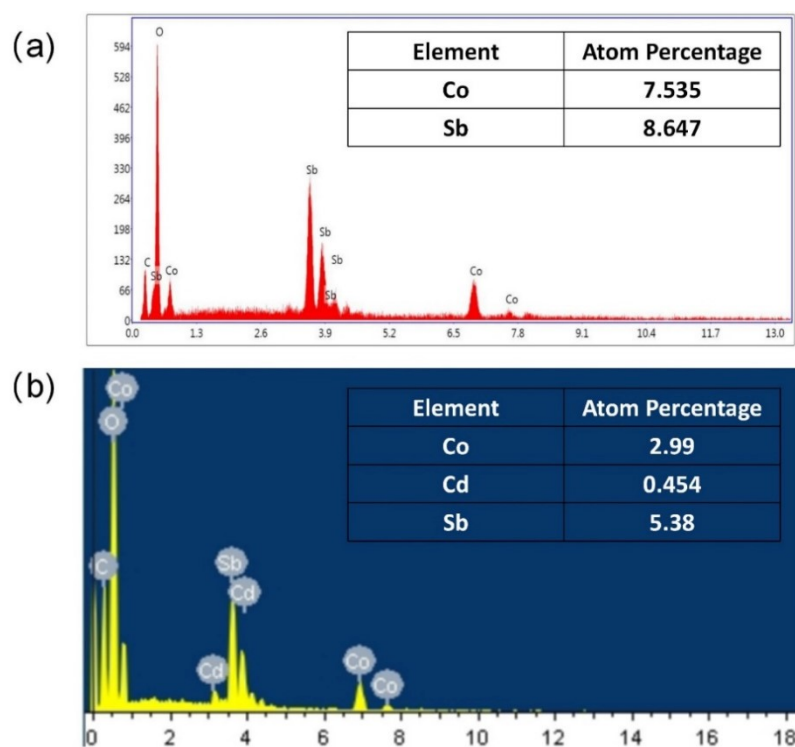

Fig. S1 Energy dispersive spectroscopy (EDS) results of compounds **1** (a) and **2** (b).

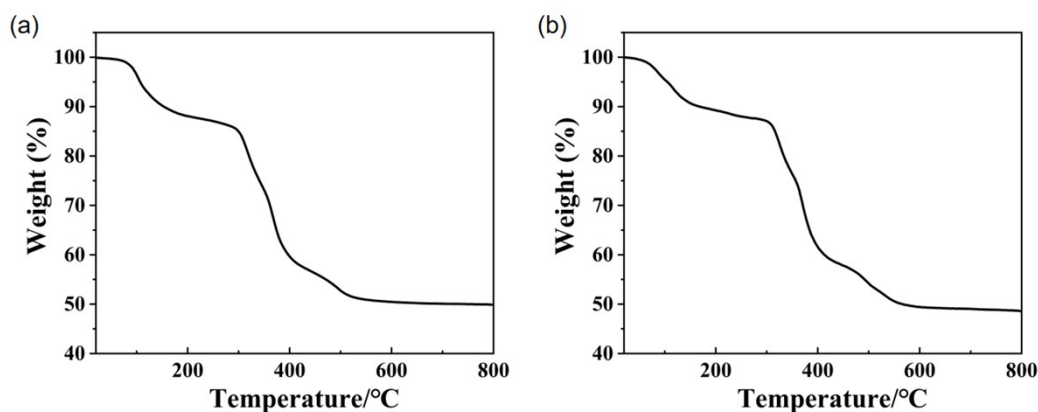

Fig. S2 Thermogravimetric curves for compounds **1** (a) and **2** (b).

Table S1 Selected bond lengths (Å) and angles (°) for **1** and **2**.

| compound <b>1</b> |            |                   |            |
|-------------------|------------|-------------------|------------|
| Sb(1)-O(37)       | 1.983(4)   | Sb(4)-O(23)       | 2.271(5)   |
| Sb(1)-O(38)       | 1.980(4)   | Sb(4)-O(42)       | 1.978(4)   |
| Sb(1)-O(39)       | 1.985(4)   | Sb(4)-O(43)       | 2.106(4)   |
| Sb(1)-O(40)       | 1.993(4)   | Sb(5)-O(4)        | 2.001(4)   |
| Sb(1)-O(41)       | 1.981(4)   | Sb(5)-O(5)        | 2.262(5)   |
| Sb(1)-O(42)       | 1.981(4)   | Sb(5)-O(41)       | 1.977(4)   |
| Sb(2)-O(10)       | 2.020(4)   | Sb(5)-O(44)       | 2.137(4)   |
| Sb(2)-O(11)       | 2.331(4)   | Sb(6)-O(34)       | 2.016(4)   |
| Sb(2)-O(39)       | 1.972(4)   | Sb(6)-O(35)       | 2.339(4)   |
| Sb(2)-O(43)       | 2.094(4)   | Sb(6)-O(40)       | 1.969(4)   |
| Sb(3)-O(28)       | 2.002(4)   | Sb(6)-O(44)       | 2.086(4)   |
| Sb(3)-O(29)       | 2.297(4)   | Sb(7)-O(13)       | 2.326(5)   |
| Sb(3)-O(37)       | 1.988(4)   | Sb(7)-O(15)       | 2.002(5)   |
| Sb(3)-O(43)       | 2.123(4)   | Sb(7)-O(38)       | 1.969(4)   |
| Sb(4)-O(22)       | 2.021(5)   | Sb(7)-O(44)       | 2.086(4)   |
| O(37)-Sb(1)-O(40) | 169.90(17) | O(43)-Sb(3)-O(29) | 151.55(16) |
| O(38)-Sb(1)-O(37) | 80.11(17)  | O(22)-Sb(4)-O(23) | 75.29(18)  |
| O(38)-Sb(1)-O(39) | 93.52(17)  | O(22)-Sb(4)-O(43) | 79.81(18)  |
| O(38)-Sb(1)-O(40) | 93.31(17)  | O(42)-Sb(4)-O(22) | 97.45(18)  |
| O(38)-Sb(1)-O(41) | 93.50(17)  | O(42)-Sb(4)-O(23) | 82.86(17)  |
| O(38)-Sb(1)-O(42) | 170.82(17) | O(42)-Sb(4)-O(43) | 86.19(16)  |
| O(39)-Sb(1)-O(37) | 93.51(17)  | O(43)-Sb(4)-O(23) | 151.15(17) |
| O(39)-Sb(1)-O(40) | 79.15(16)  | O(4)-Sb(5)-O(5)   | 75.49(17)  |
| O(41)-Sb(1)-O(37) | 95.49(17)  | O(4)-Sb(5)-O(44)  | 77.66(16)  |
| O(41)-Sb(1)-O(39) | 169.41(18) | O(41)-Sb(5)-O(4)  | 97.07(17)  |
| O(41)-Sb(1)-O(40) | 92.54(17)  | O(41)-Sb(5)-O(5)  | 85.34(17)  |
| O(41)-Sb(1)-O(42) | 80.07(17)  | O(41)-Sb(5)-O(44) | 85.01(16)  |
| O(42)-Sb(1)-O(37) | 93.90(17)  | O(44)-Sb(5)-O(5)  | 150.05(17) |
| O(42)-Sb(1)-O(39) | 93.78(17)  | O(34)-Sb(5)-O(35) | 74.54(17)  |

|                   |            |                   |            |
|-------------------|------------|-------------------|------------|
| O(42)-Sb(1)-O(40) | 93.51(17)  | O(34)-Sb(5)-O(44) | 79.76(17)  |
| O(10)-Sb(2)-O(11) | 74.80(16)  | O(40)-Sb(5)-O(34) | 97.93(17)  |
| O(10)-Sb(2)-O(43) | 79.34(17)  | O(40)-Sb(5)-O(35) | 83.47(17)  |
| O(39)-Sb(2)-O(10) | 97.92(17)  | O(40)-Sb(5)-O(44) | 86.33(16)  |
| O(39)-Sb(2)-O(11) | 84.37(17)  | O(44)-Sb(5)-O(35) | 150.66(16) |
| O(39)-Sb(2)-O(43) | 85.98(16)  | O(15)-Sb(7)-O(13) | 74.58(17)  |
| O(43)-Sb(2)-O(11) | 150.79(17) | O(15)-Sb(7)-O(44) | 80.37(17)  |
| O(28)-Sb(3)-O(29) | 75.78(17)  | O(38)-Sb(7)-O(13) | 82.56(17)  |
| O(28)-Sb(3)-O(43) | 78.88(17)  | O(38)-Sb(7)-O(15) | 96.88(17)  |
| O(37)-Sb(3)-O(28) | 95.85(17)  | O(38)-Sb(7)-O(44) | 86.74(16)  |
| O(37)-Sb(3)-O(29) | 85.10(16)  | O(44)-Sb(7)-O(13) | 151.27(17) |
| O(37)-Sb(3)-O(43) | 84.82(16)  |                   |            |

---

Compound 2

---

|                   |          |                   |          |
|-------------------|----------|-------------------|----------|
| Sb(1)-O(37)       | 1.990(5) | Sb(4)-O(23)       | 2.288(6) |
| Sb(1)-O(38)       | 1.978(5) | Sb(4)-O(42)       | 1.991(5) |
| Sb(1)-O(39)       | 1.983(5) | Sb(4)-O(43)       | 2.096(5) |
| Sb(1)-O(40)       | 1.994(5) | Sb(5)-O(4)        | 2.009(6) |
| Sb(1)-O(41)       | 1.982(5) | Sb(5)-O(5)        | 2.265(7) |
| Sb(1)-O(42)       | 1.983(5) | Sb(5)-O(41)       | 1.984(5) |
| Sb(2)-O(10)       | 2.020(5) | Sb(5)-O(44)       | 2.130(5) |
| Sb(2)-O(11)       | 2.335(6) | Sb(6)-O(34)       | 2.017(6) |
| Sb(2)-O(39)       | 1.979(5) | Sb(6)-O(35)       | 2.335(6) |
| Sb(2)-O(43)       | 2.108(5) | Sb(6)-O(40)       | 1.979(5) |
| Sb(3)-O(28)       | 2.014(6) | Sb(6)-O(44)       | 2.090(5) |
| Sb(3)-O(29)       | 2.297(6) | Sb(7)-O(13)       | 2.319(6) |
| Sb(3)-O(37)       | 1.986(5) | Sb(7)-O(15)       | 1.998(5) |
| Sb(3)-O(43)       | 2.129(5) | Sb(7)-O(38)       | 1.976(5) |
| Sb(4)-O(22)       | 2.006(6) | Sb(7)-O(44)       | 2.090(6) |
| O(37)-Sb(1)-O(40) | 169.8(2) | O(43)-Sb(3)-O(29) | 150.9(2) |
| O(38)-Sb(1)-O(37) | 80.1(2)  | O(22)-Sb(4)-O(23) | 75.4(2)  |
| O(38)-Sb(1)-O(39) | 93.5(2)  | O(22)-Sb(4)-O(43) | 79.9(2)  |
| O(38)-Sb(1)-O(40) | 93.5(2)  | O(42)-Sb(4)-O(22) | 97.2(2)  |
| O(38)-Sb(1)-O(41) | 93.7(2)  | O(42)-Sb(4)-O(23) | 82.7(2)  |
| O(38)-Sb(1)-O(42) | 171.0(2) | O(42)-Sb(4)-O(43) | 87.1(2)  |
| O(39)-Sb(1)-O(37) | 93.1(2)  | O(43)-Sb(4)-O(23) | 151.7(2) |
| O(39)-Sb(1)-O(40) | 79.2(2)  | O(4)-Sb(5)-O(5)   | 75.2(2)  |
| O(41)-Sb(1)-O(37) | 95.3(2)  | O(4)-Sb(5)-O(44)  | 78.0(2)  |
| O(41)-Sb(1)-O(39) | 169.8(2) | O(41)-Sb(5)-O(4)  | 96.4(2)  |
| O(41)-Sb(1)-O(40) | 93.0(2)  | O(41)-Sb(5)-O(5)  | 84.6(2)  |
| O(41)-Sb(1)-O(42) | 79.9(2)  | O(41)-Sb(5)-O(44) | 85.6(2)  |
| O(42)-Sb(1)-O(37) | 94.2(2)  | O(44)-Sb(5)-O(5)  | 150.2(2) |
| O(42)-Sb(1)-O(39) | 93.8(2)  | O(34)-Sb(5)-O(35) | 74.4(2)  |
| O(42)-Sb(1)-O(40) | 93.1(2)  | O(34)-Sb(5)-O(44) | 80.1(2)  |

|                   |           |                   |          |
|-------------------|-----------|-------------------|----------|
| O(10)-Sb(2)-O(11) | 74.5(2)   | O(40)-Sb(5)-O(34) | 97.9(2)  |
| O(10)-Sb(2)-O(43) | 80.2(2)   | O(40)-Sb(5)-O(35) | 83.8(2)  |
| O(39)-Sb(2)-O(10) | 98.2(2)   | O(40)-Sb(5)-O(44) | 86.7(2)  |
| O(39)-Sb(2)-O(11) | 84.6(2)   | O(44)-Sb(5)-O(35) | 151.2(2) |
| O(39)-Sb(2)-O(43) | 86.6(2)   | O(15)-Sb(7)-O(13) | 75.3(2)  |
| O(43)-Sb(2)-O(11) | 151.6(2)  | O(15)-Sb(7)-O(44) | 80.0(2)  |
| O(28)-Sb(3)-O(29) | 75.2(2)   | O(38)-Sb(7)-O(13) | 82.7(2)  |
| O(28)-Sb(3)-O(43) | 78.9(2)   | O(38)-Sb(7)-O(15) | 97.2(2)  |
| O(37)-Sb(3)-O(28) | 96.1(2)   | O(38)-Sb(7)-O(44) | 86.7(2)  |
| O(37)-Sb(3)-O(29) | 84.6(2)   | O(44)-Sb(7)-O(13) | 151.6(2) |
| O(37)-Sb(3)-O(43) | 85.27(19) |                   |          |

Table S2 The bond valence sum calculations for compounds **1** and **2**.

| Atom  | BVS of <b>1</b> | BVS of <b>2</b> | Valence |
|-------|-----------------|-----------------|---------|
| Sb(1) | 4.942           | 4.926           | +5      |
| Sb(2) | 2.835           | 2.788           | +3      |
| Sb(3) | 2.820           | 2.786           | +3      |
| Sb(4) | 2.959           | 2.860           | +3      |
| Sb(5) | 2.865           | 2.837           | +3      |
| Sb(6) | 2.859           | 2.828           | +3      |
| Sb(7) | 2.904           | 2.896           | +3      |

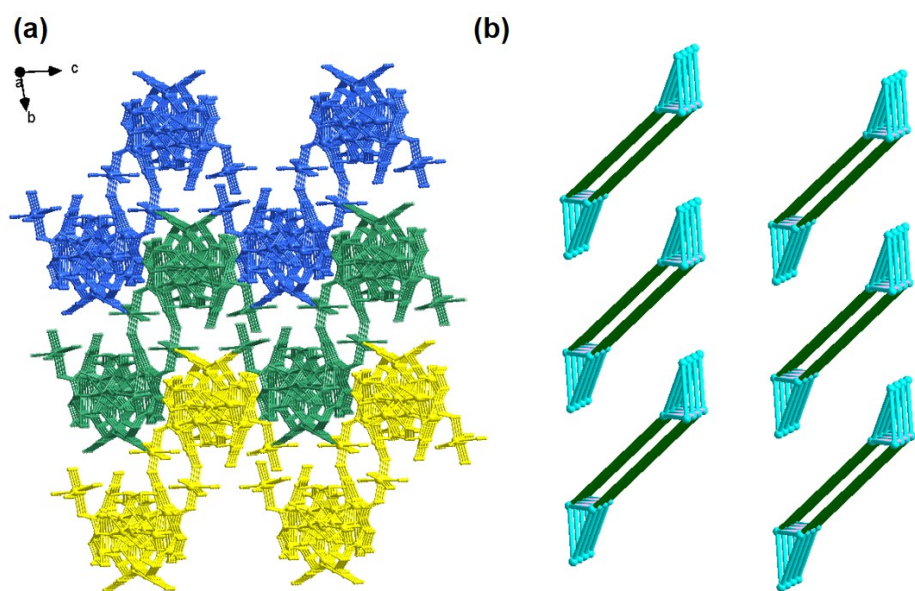

Fig. S3 (a) Packing of the anionic 1-D belts in compound **2** viewed along the  $a$ -axis. The neighbouring 1D belts are represented in different colors for clarity. (b) Schematic 1-D belt structure viewed along the  $a$ -axis.

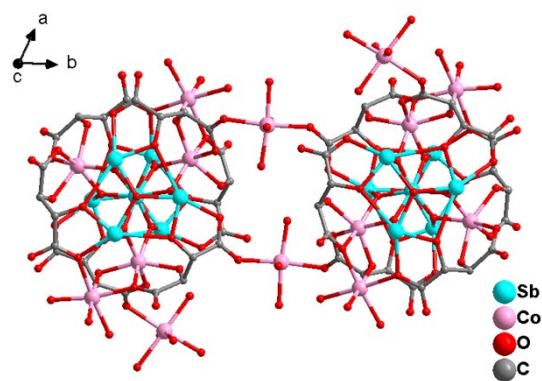

Fig. S4 Structure of the dimerization unit in compound **1**. For clarity, the hydrogen atoms are omitted.

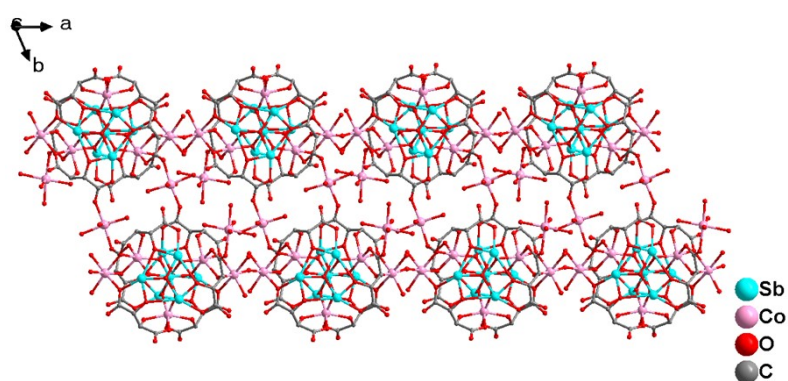

Fig. S5 Structure of the 1-D belt in compound **1**. For clarity, the hydrogen atoms and cation groups are omitted.

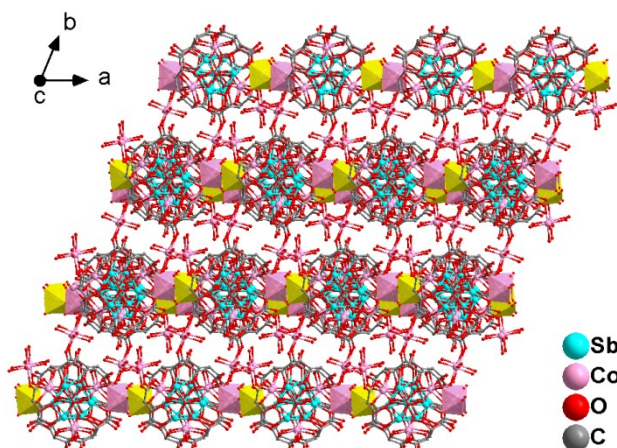

Fig. S6 Packing of the anionic 1-D belts in compound **1** viewed along the *c*-axis. For clarity, the cationic groups as well as lattice water molecules are omitted. Pink polyhedra represent the bridging  $\{\text{Co}(4)\text{O}_6\}$  structural motifs; yellow polyhedra represent the bridging  $\{\text{Co}_{0.2}(7)\text{O}_6\}$  structural motifs.

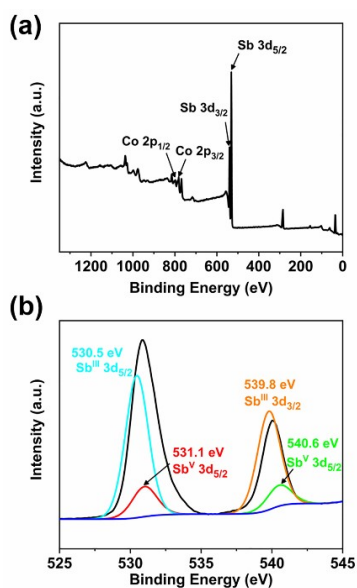

Fig. S7 (a) The survey spectrum of compound **1**. (b) X-ray photoelectron spectra of Sb3d of **1**.

We also carried out the X-ray photoelectron spectroscopy analysis of compound **1**. The characteristic peaks of elements Co and Sb can be found in the total spectrum (Fig. S7a); the characteristic peaks of Sb(III)3d<sub>5/2</sub> and Sb(III)3d<sub>3/2</sub> are shown at 530.5 eV and 539.8 eV, respectively, and the characteristic peaks of Sb(V)3d<sub>5/2</sub> and Sb(V)3d<sub>3/2</sub> are shown at 531.1 eV and 540.6 eV, respectively, Fig. S7b.

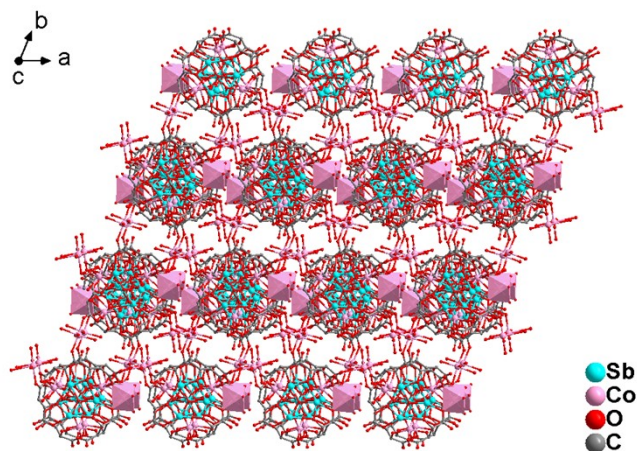

Fig. S8 Packing of the anionic 0-D cluster-dimers in compound **1** viewed along the c-axis, when Co(7) atoms are not considered. Pink polyhedra represent the bridging {Co(4)O<sub>6</sub>} structural motifs. For clarity, the cationic part as well as the lattice water molecules are omitted.



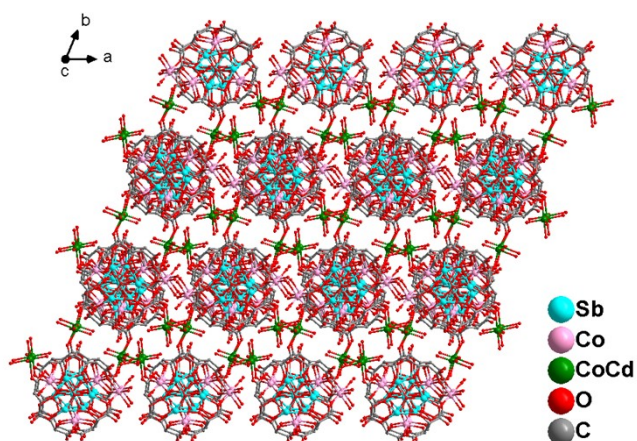

Fig. S9 Packing of the anionic 0-D cluster-dimers in compound **2** viewed along the *c*-axis, when Co(7) atoms are not considered. For clarity, the cationic part as well as the lattice water molecules are omitted.

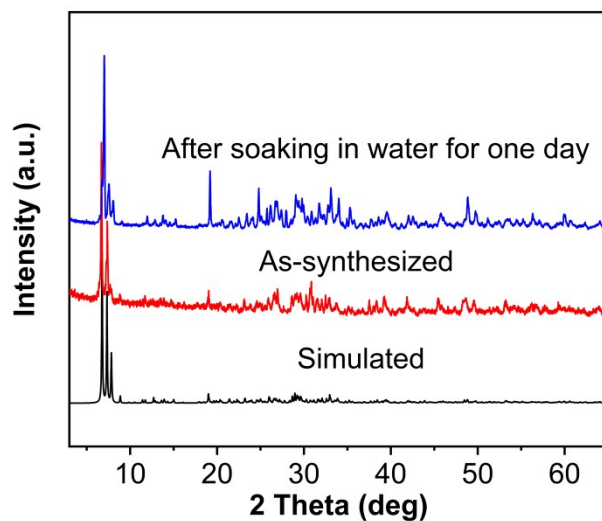

Fig. S10 Experimental PXRD patterns for **1** compared with the simulated one from single-crystal X-ray data.

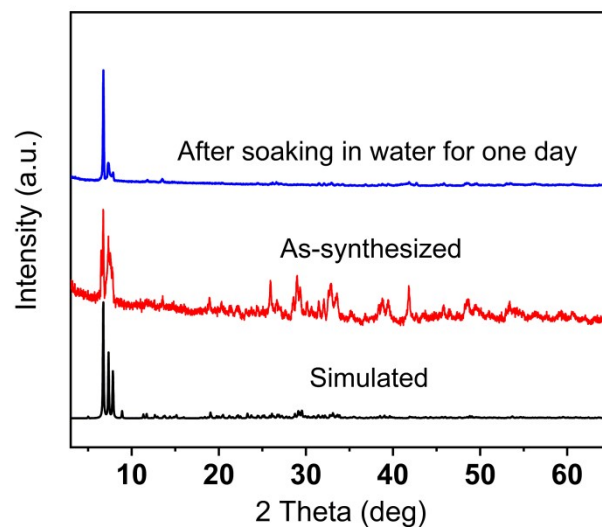

Fig. S11 Experimental PXRD patterns for **2** compared with the simulated one from single-crystal X-ray data.

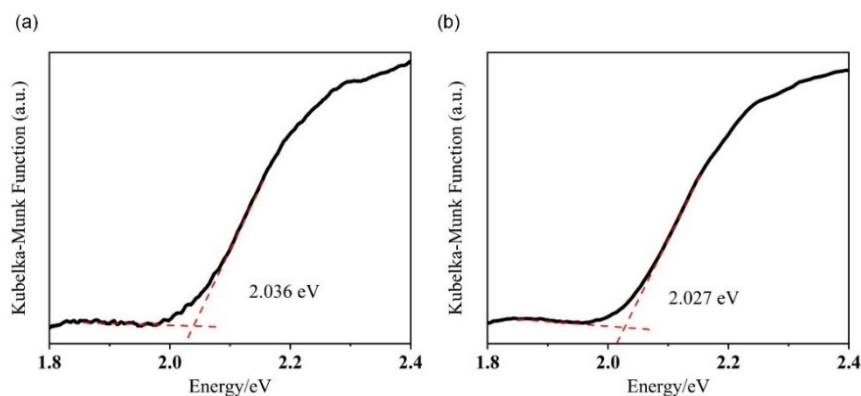

Fig. S12 Solid-state UV-vis absorption spectra of compounds **1** (a) and **2** (b).

Table S3 Proton conductivity ( $\sigma$ ) values of **2** under 25 °C at different relative humidity.

| RH %                           | 55                    | 70                    | 85                    | 98                    |
|--------------------------------|-----------------------|-----------------------|-----------------------|-----------------------|
| $\sigma$ (S·cm <sup>-1</sup> ) | $2.84 \times 10^{-8}$ | $6.19 \times 10^{-8}$ | $2.98 \times 10^{-7}$ | $3.92 \times 10^{-6}$ |

Table S4 Proton conductivity ( $\sigma$ ) values of **2** under 98% RH at different temperature.

| T/°C                           | 25                    | 35                    | 40                    | 50                    | 55                    | 65                    | 70                    | 85                    |
|--------------------------------|-----------------------|-----------------------|-----------------------|-----------------------|-----------------------|-----------------------|-----------------------|-----------------------|
| $\sigma$ (S·cm <sup>-1</sup> ) | $3.92 \times 10^{-6}$ | $3.92 \times 10^{-5}$ | $8.72 \times 10^{-5}$ | $1.76 \times 10^{-4}$ | $2.42 \times 10^{-4}$ | $3.79 \times 10^{-4}$ | $5.03 \times 10^{-4}$ | $1.42 \times 10^{-3}$ |

Table S5 The proton conductivity of selected metal-oxo-cluster based proton conducting materials.

| Compounds                                                                                                                                                                                                                                                                                                                                                                                                                                                                                                                                                                                                                               | Conductivity (S cm <sup>-1</sup> ) | Test Conditions   | ref |
|-----------------------------------------------------------------------------------------------------------------------------------------------------------------------------------------------------------------------------------------------------------------------------------------------------------------------------------------------------------------------------------------------------------------------------------------------------------------------------------------------------------------------------------------------------------------------------------------------------------------------------------------|------------------------------------|-------------------|-----|
| H <sub>14</sub> [Na <sub>6</sub> (H <sub>2</sub> O) <sub>12</sub> ] <sub>4</sub> [K <sub>42</sub> Ge <sub>8</sub> W <sub>72</sub> O <sub>272</sub> (H <sub>2</sub> O) <sub>60</sub> ] <sub>4</sub> ·solvent                                                                                                                                                                                                                                                                                                                                                                                                                             | $6.80 \times 10^{-2}$              | 85 °C,<br>98% RH  | 9   |
| Na <sub>70</sub> K <sub>4</sub> H <sub>12</sub> [La <sub>10</sub> Ni <sub>48</sub> W <sub>140</sub> Sb <sub>16</sub> P <sub>12</sub> O <sub>568</sub> (OH) <sub>24</sub> (H <sub>2</sub> O) <sub>20</sub> ] <sub>2</sub> ·252H <sub>2</sub> O                                                                                                                                                                                                                                                                                                                                                                                           | $2.05 \times 10^{-2}$              | 22 °C,<br>100% RH | 10  |
| H <sub>13</sub> (HIm) <sub>4</sub> K <sub>2</sub> Na <sub>4</sub> (H <sub>2</sub> O) <sub>9</sub> [Sb <sup>III</sup> <sub>9</sub> Sb <sup>V</sup> Sm <sub>3</sub> O <sub>14</sub> (H <sub>2</sub> O) <sub>3</sub> ][SbW <sub>9</sub> O <sub>33</sub> ](PW <sub>9</sub> O <sub>34</sub> ) <sub>2</sub> ·26H <sub>2</sub> O                                                                                                                                                                                                                                                                                                               | $1.64 \times 10^{-2}$              | 85 °C,<br>98% RH  | 8   |
| [pyH] <sub>8</sub> Ba <sub>13</sub> Sb <sub>36</sub> Cl <sub>34</sub> O <sub>54</sub> ·2py·24H <sub>2</sub> O                                                                                                                                                                                                                                                                                                                                                                                                                                                                                                                           | $1.55 \times 10^{-2}$              | 80 °C,<br>95% RH  | 48  |
| Sm(H <sub>2</sub> O) <sub>5</sub> (CO <sub>2</sub> CH <sub>2</sub> NH <sub>3</sub> ) <sub>2</sub> [Al(OH) <sub>6</sub> Mo <sub>6</sub> O <sub>18</sub> ] <sub>2</sub> ·10H <sub>2</sub> O                                                                                                                                                                                                                                                                                                                                                                                                                                               | $4.53 \times 10^{-3}$              | 80 °C,<br>95% RH  | 42  |
| [3-MepyH] <sub>8</sub> Ba <sub>13</sub> Sb <sub>36</sub> Cl <sub>34</sub> O <sub>54</sub> ·2(3-Mepy)·16H <sub>2</sub> O                                                                                                                                                                                                                                                                                                                                                                                                                                                                                                                 | $3.1 \times 10^{-3}$               | 80 °C,<br>95% RH  | 48  |
| H <sub>3</sub> K <sub>5</sub> (H <sub>2</sub> O) <sub>11</sub> {Cd(H <sub>2</sub> O) <sub>4</sub> [Cd(H <sub>2</sub> O)Fe <sub>4</sub> Cd <sub>2</sub> Sb <sub>6</sub> ( $\mu_4$ -O) <sub>5</sub> ( $\mu_3$ -O) <sub>3</sub> (L-tta) <sub>6</sub> ][Cd(H <sub>2</sub> O) <sub>2</sub> Fe <sub>4</sub> Cd <sub>2</sub> Sb <sub>6</sub> ( $\mu_4$ -O) <sub>4</sub> ( $\mu_3$ -O) <sub>4</sub> (L-tta) <sub>6</sub> ][Cd(H <sub>2</sub> O) <sub>2</sub> Fe <sub>4</sub> Cd <sub>2</sub> Sb <sub>6</sub> ( $\mu_4$ -O) <sub>4</sub> ( $\mu_3$ -O) <sub>4</sub> (L-tta) <sub>6</sub> Cd(H <sub>2</sub> O) <sub>5</sub> ]}·17H <sub>2</sub> O | $2.95 \times 10^{-3}$              | 85 °C,<br>98% RH  | 29  |
| H <sub>2</sub> [Co(en) <sub>3</sub> ] <sub>3</sub> Ta <sub>6</sub> O <sub>19</sub>                                                                                                                                                                                                                                                                                                                                                                                                                                                                                                                                                      | $2.67 \times 10^{-3}$              | 85 °C,<br>98% RH  | 46  |
| H <sub>5</sub> {MCd(H <sub>2</sub> O) <sub>6</sub> [M(H <sub>2</sub> O) <sub>3</sub> Co <sub>3</sub> Sb <sup>V</sup> Sb <sup>III</sup> <sub>6</sub> ( $\mu_3$ -O) <sub>8</sub> (L-tta) <sub>6</sub> ]}·7H <sub>2</sub> O<br>(M = Cd <sub>0.5</sub> + Co <sub>0.5</sub> )                                                                                                                                                                                                                                                                                                                                                                | $2.43 \times 10^{-3}$              | 85 °C,<br>98% RH  | 29  |
| Na <sub>16</sub> (NH <sub>4</sub> ) <sub>10</sub> H <sub>8</sub> {[W <sub>14</sub> Ce <sup>IV</sup> O <sub>61</sub> ][W <sub>3</sub> Bi <sub>6</sub> Ce <sup>III</sup> <sub>3</sub> (H <sub>2</sub> O) <sub>3</sub> O <sub>14</sub> ][ $\alpha$ -BiW <sub>9</sub> O <sub>33</sub> ] <sub>2</sub> }·ca.38H <sub>2</sub> O                                                                                                                                                                                                                                                                                                                | $2.4 \times 10^{-3}$               | 25 °C,<br>98% RH  | 40  |



|                                                                                                                                                                       |                       |                  |    |
|-----------------------------------------------------------------------------------------------------------------------------------------------------------------------|-----------------------|------------------|----|
| $\text{Li}_2[\text{Cr}_3\text{O}(\text{OOCH})_6(\text{etpy})_3]_2[\alpha\text{-SiW}_{12}\text{O}_{40}] \cdot n\text{H}_2\text{O}$                                     | $1.9 \times 10^{-3}$  | 50 °C,<br>95% RH | 44 |
| $(\text{H}_3\text{O})_7[\text{Cd}_7\text{Sb}_{24}\text{O}_{24}(\text{L-tta})_9(\text{L-Htta})_3(\text{H}_2\text{O})_6] \cdot 29\text{H}_2\text{O}$                    | $1.88 \times 10^{-3}$ | 85 °C,<br>98% RH | 30 |
| $(\text{H}_3\text{O})(\text{UO}_2)_3[\text{Cd}_7\text{Sb}_{24}\text{O}_{24}(\text{L-tta})_9(\text{L-Htta})_3(\text{H}_2\text{O})_6] \cdot 48\text{H}_2\text{O}$       | $1.87 \times 10^{-3}$ | 85 °C,<br>98% RH | 30 |
| $(\text{H}_3\text{O})_4\text{Sr}_{1.5}[\text{Cd}_7\text{Sb}_{24}\text{O}_{24}(\text{L-tta})_9(\text{L-Htta})_3(\text{H}_2\text{O})_6] \cdot 34\text{H}_2\text{O}$     | $1.45 \times 10^{-3}$ | 85 °C,<br>98% RH | 30 |
| $\text{La}_{0.67}(\text{H}_2\text{O})\text{La}(\text{H}_2\text{O})_6 \{[\text{La}(\text{H}_2\text{O})_3(\text{SiW}_{11}\text{O}_{39})]\} \cdot 7\text{H}_2\text{O}$   | $1.26 \times 10^{-3}$ | 90 °C,<br>98% RH | 45 |
| $[\text{Co}^{\text{III}}(\text{en})_3]_4\text{C}_2\text{O}_4\{\text{Ta}_6\text{O}_{19}[\text{Co}^{\text{III}}(\text{en})]\}_2 \cdot 66\text{H}_2\text{O}$             | $1.1 \times 10^{-3}$  | 85 °C,<br>98% RH | 47 |
| $(\text{H}_3\text{O})_3\text{Ba}_2[\text{Cd}_7\text{Sb}_{24}\text{O}_{24}(\text{L-tta})_9(\text{L-Htta})_3(\text{H}_2\text{O})_6] \cdot 36\text{H}_2\text{O}$         | $1.03 \times 10^{-3}$ | 85 °C,<br>98% RH | 30 |
| $\text{Na}_2(\text{H}_2\text{O})_6\text{H}_2[\text{Co}(\text{en})_3]_2\text{Ta}_6\text{O}_{19}$                                                                       | $6.18 \times 10^{-4}$ | 85 °C,<br>98% RH | 46 |
| $\text{Na}_2[\text{Cr}_3\text{O}(\text{OOCH})_6(\text{etpy})_3]_2[\alpha\text{-SiW}_{12}\text{O}_{40}] \cdot n\text{H}_2\text{O}$                                     | $4.4 \times 10^{-4}$  | 50 °C,<br>95% RH | 44 |
| $[\text{H}_2\text{en}]_4[\text{Ni}_5(\text{OH})_3(\text{trzS})_3(\text{en})(\text{H}_2\text{O})(\text{B-}\alpha\text{-PW}_9\text{O}_{34})] \cdot 6\text{H}_2\text{O}$ | $2.4 \times 10^{-4}$  | 85 °C,<br>98% RH | 43 |
| $(\text{H}_2\text{en})_4\text{H}_2[\text{V}_{12}\text{B}_{18}\text{O}_{54}(\text{OH})_6(\text{H}_2\text{O})] \cdot 11\text{H}_2\text{O}$                              | $1.87 \times 10^{-4}$ | 60 °C,<br>98% RH | 41 |
| $\text{K}_2[\text{Cr}_3\text{O}(\text{OOCH})_6(\text{etpy})_3]_2[\alpha\text{-SiW}_{12}\text{O}_{40}] \cdot n\text{H}_2\text{O}$                                      | $1.6 \times 10^{-4}$  | 50 °C,<br>95% RH | 44 |
| $\text{Cs}_2[\text{Cr}_3\text{O}(\text{OOCH})_6(\text{etpy})_3]_2[\alpha\text{-SiW}_{12}\text{O}_{40}] \cdot n\text{H}_2\text{O}$                                     | $1.2 \times 10^{-7}$  | 50 °C,<br>95% RH | 44 |

---
